# Supplementary material
Source: publisher figshare collection journal article supplement (https://karger.figshare.com/ndownloader/files/8704933)

## Appendix 1:

Genetic crosses to generate ISWI mutant with TE89 insertion.

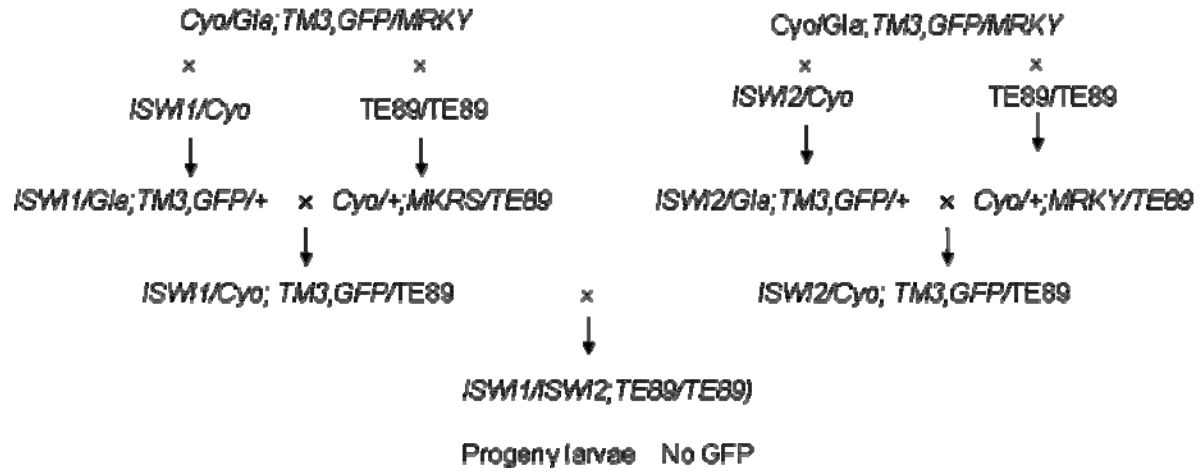

Supplement: Supplementary file 1 [file 8704933]
